# Supplementary material for: Chain conformation and aggregation structure regulation of an efficient acceptor–acceptor type photovoltaic polymer
Source: Royal Society of Chemistry journal article supplement (doi:10.1039/d4tc03519d), 2024-01-01
Supplement: d4tc03519d1.pdf [file d4tc03519d1.pdf]

## Chain Conformation and Aggregation Structure Regulation of an Efficient Acceptor-Acceptor Typed Photovoltaic Polymer

Xiaoman Gui,<sup>[a]</sup> Jianling Ni,<sup>[a]</sup> Han Shen,<sup>[a]</sup> Bing Zheng,<sup>[a]</sup> Shisong Sun,<sup>[a]</sup> Panfeng Gao,<sup>[b]</sup> Lijun Huo\*<sup>[a]</sup>

X. Gui, J. Ni, H. Shen, B. Zheng, S. Sun, Prof. L. Huo

School of Chemistry Beihang University Beijing 100191, PR China. E-mail:  
[huolijun@buaa.edu.cn](mailto:huolijun@buaa.edu.cn)

Prof. P. Gao

School of Environmental Science and Engineering, Xiamen University of Technology,  
Xiamen, China

### 1. Materials and synthesis

All chemicals, unless otherwise specified, were purchased from commercial resources and used as received. Toluene was distilled from sodium benzophenone under nitrogen before using. The compound A<sub>1</sub>, A<sub>2</sub> and A<sub>3</sub> were purchased from Woer Jiming research institute.

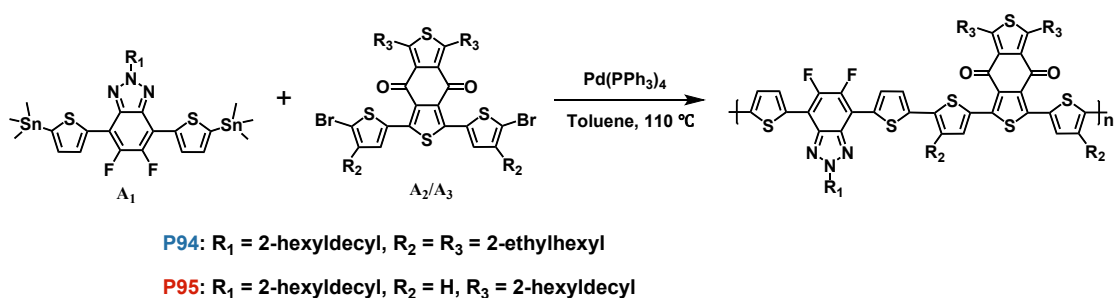

**Scheme S1.** The synthetic routes of the copolymers.

### Synthesis of the copolymer P94

The A<sub>1</sub> (95.7 mg, 0.11 mmol), A<sub>2</sub> (109.0 mg, 0.11 mmol), Pd(PPh<sub>3</sub>)<sub>4</sub> (5%mol) were

dissolved into toluene of 8 mL in a flask under nitrogen. The solution was flushed with nitrogen for an additional 15 min. Then, the reaction mixture was stirred for 24 h at 110 °C. Subsequently, the polymer was collected by filtration and purified by washing, extracted on a Soxhlet extractor with methanol and hexane in succession. The final product was obtained by precipitating the chloroform solution in methanol, collected by filtration and dried in vacuo to get the **P94** as dark red solid (yield: 51%). Calculated for  $C_{80}H_{107}F_2N_3O_2S_6$ : C, 69.98; H, 7.85; N, 3.06. Found: C, 69.44, H, 7.79, N, 3.01.  $M_n$  = 16.4K; polydispersity = 2.29.

### **Synthesis of the copolymer P95**

The  $A_1$  (113.1 mg, 0.13 mmol),  $A_3$  (128.8 mg, 0.13 mmol),  $Pd(PPh_3)_4$  (5%mol) were dissolved into toluene of 10 mL in a flask under nitrogen. The solution was flushed with nitrogen for an additional 15 min. Then, the reaction mixture was stirred for 24 h at 110 °C. Subsequently, the polymer was collected by filtration and purified by washing, extracted on a Soxhlet extractor with methanol and hexane in succession. The final product was obtained by precipitating the chloroform solution in methanol, collected by filtration and dried in vacuo to get the **P95** as dark red solid (yield: 64%). Calculated for  $C_{80}H_{107}F_2N_3O_2S_6$ : C, 69.98; H, 7.85; N, 3.06. Found: C, 69.32, H, 7.81, N, 2.98.  $M_n$  = 17.5K; polydispersity = 1.99.

## **2.Characterization of materials**

$^1H$  NMR spectra were recorded on a Bruker AVANCE 300 MHz spectrometer using  $CDCl_3$  as the solvent. The molecular weight of polymers was determined by gel permeation chromatography (GPC) relative to polystyrene standards with chloroform as the eluent. Thermal gravimetric analysis (TGA) was performed on a Perkin-Elmer Pyris 1 thermogravimetric analyzer. UV–vis absorption measurements were carried out on a Hitachi (model U-3010) UV–vis spectrophotometer. Cyclic voltammetric (CV) measurements were carried out in a conventional three-electrode cell using a platinum plate as the working electrode, a platinum wire as the counter electrode, and an  $Ag/Ag^+$  electrode as the reference electrode on a Zahner IM6e Electrochemical workstation in a tetrabutylammonium hexafluorophosphate ( $Bu_4NPF_6$ ) (0.1 M) acetonitrile solution at

a scan rate of 20 mV s<sup>-1</sup>. The  $E^{\text{ox}}$  and  $E^{\text{re}}$  values were calibrated as Fc/Fc<sup>+</sup> value was as internal standard. According to the following formula, we could calculate the HOMO/LUMO values:

$$\text{HOMO} = eE^{\text{ox}} + 4.8 \text{ (v Ag/Ag}^+) - E^{\text{ox}}_{\text{Fc/Fc}^+}$$

$$\text{LUMO} = eE^{\text{re}} + 4.8 \text{ (v Ag/Ag}^+) - E^{\text{re}}_{\text{Fc/Fc}^+}$$

### 3. Device Fabrication and Characterization

#### (1) Device Fabrication

An inverted architecture was fabricated with ITO/PEDOT:PSS/active layer/PDINO/Ag. The ITO-coated glass substrates were sequentially ultrasonicated in soap water, deionized water, acetone, and isopropyl alcohol for at least 15 min, and ultimately dried in an oven overnight. The ITO-coated glass substrates were treated by uv-ozone for 10 min. Filter the PEDOT:PSS aqueous solution (Baytron P 4083, from HCStarck) through a 0.45 mm filter, and pre-coat it on the pre-cleaned ITO glass at 5000 rpm for 30 seconds, and then heat the ITO substrate in the air at 150°C annealing for 0.5 h. The polymer donor: ITIC-4Cl (D:A=1:1.1, 15 mg mL<sup>-1</sup> in total) or the polymer donors: Y6 (D:A=1:1.2, 18 mg mL<sup>-1</sup> in total) was dissolved in chloroform, adding 1-chloronaphthalene (CN) (0.7%, v/v) as additive). The blended solution was spin-coated on the PEDOT:PSS layer at 3000 rpm for 30s. It is then annealed at 110°C for 10 minutes. Then PNDIT-F3N methanol solution with a concentration of 0.3 mg mL<sup>-1</sup> was deposited on the active layer at a speed of 3000 rpm for 30 seconds to provide a PDINO cathode modification layer. After cooling to room temperature, the sample was transferred to the evaporation chamber. Under the pressure of 1×10<sup>-5</sup> Pa, about 100 nm of Ag electrode was evaporated and deposited. The device area is 4.0 mm<sup>2</sup>. The active area of the devices is 4.0 mm<sup>2</sup>. Current density-voltage ( $J$ - $V$ ) characteristics were measured by a Keithley 2400 Source Measure Unit, in N<sub>2</sub> atmosphere under an AM 1.5G solar simulator with an irradiation light intensity of 100mw·cm<sup>-2</sup>. The external quantum efficiency (EQE) of the devices was measured by using a QEX10 solar cell EQE measurement system (PV measurements.Inc.). The light intensity at each wavelength was calibrated with a standard single-crystal Si photovoltaic cell.

## **(2) Space-Charge-Limited Current (SCLC)**

The current density–voltage (J–V) characteristics of the hole or electron only devices are fitted by the Mott–Gurney law:

$$J = (9/8)\epsilon_r\epsilon_0\mu(V^2/L^3)$$

where  $J$  is the current density,  $\epsilon_r$  is the dielectric permittivity of the active layer,  $\epsilon_0$  is the vacuum permittivity,  $L$  is the thickness of the active layer,  $\mu$  is the mobility.  $V=V_{\text{app}} - V_{\text{bi}}$ , where  $V_{\text{app}}$  is the applied voltage,  $V_{\text{bi}}$  is the offset voltage ( $V_{\text{bi}}$  is 0 V here). The mobility can be calculated from the slope of the  $J^{0.5}\sim V$  curves.

## **(3) Grazing Incidence Wide-Angle X-ray Scattering (GIWAXS) Characterization**

GIWAXS measurements were performed at beamline 7.3.3 at the Advanced Light Source. Samples were prepared on Si substrates using identical blend solutions as those used in devices. The 10 keV X-ray beam was incident at a grazing angle of  $0.12^\circ$ - $0.16^\circ$ , selected to maximize the scattering intensity from the samples. The scattered x-rays were detected using a Dectris Pilatus 2M photon counting detector.

## **(4) Atomic force microscopy (AFM) Characterization**

AFM images were investigated on a Dimension Icon AFM (Bruker) in a tapping mode.

## **(5) Transmission Electron Microscopy (TEM) Characterization**

TEM images were performed on a JEOL JEM-1400 transmission electron microscope. TEM samples were prepared as follows: First, the active layer was spin cast on the top of ITO/PEDOT:PSS substrates; Then, the active layer film was peeled off and floated onto the surface of deionized water; Finally, the floated films were picked up on a carbon film 200 mesh copper grid for TEM measurements.

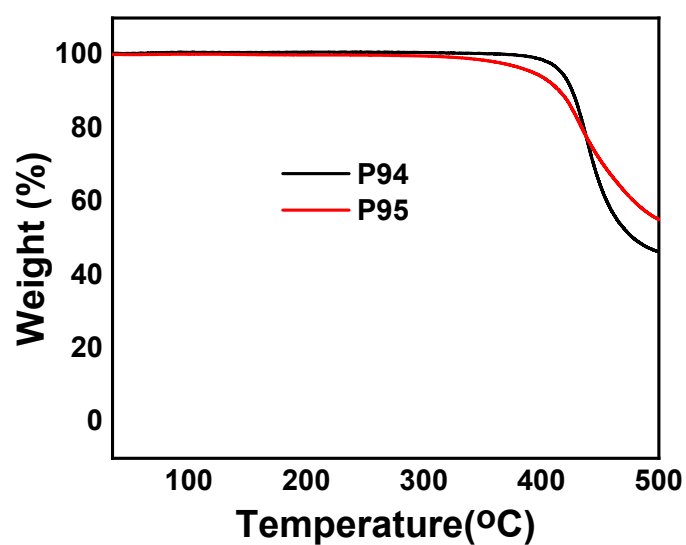

**Figure S1.** TGA plots of polymers with a heating rate of 20 °C/min under the inert atmosphere.

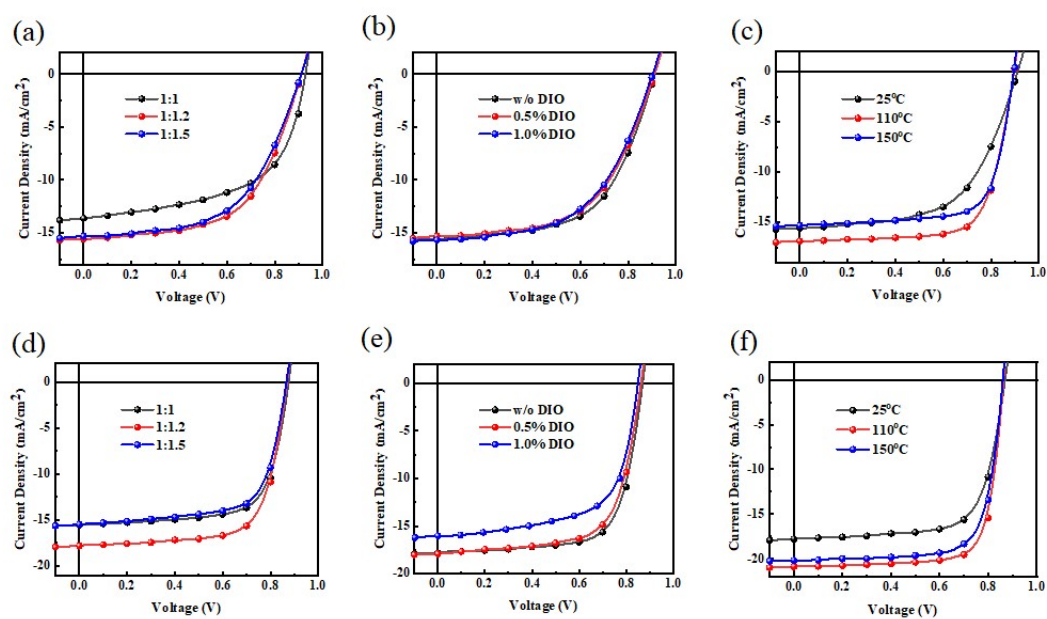

**Figure S2.** Photovoltaic performance of the OSCs based on P94:ITIC-4Cl and P95:ITIC-4Cl with different device fabrication conditions: (a), (d) donor:acceptor weight ratios; (b), (e) DIO additive; (c), (f) thermal annealing temperature.

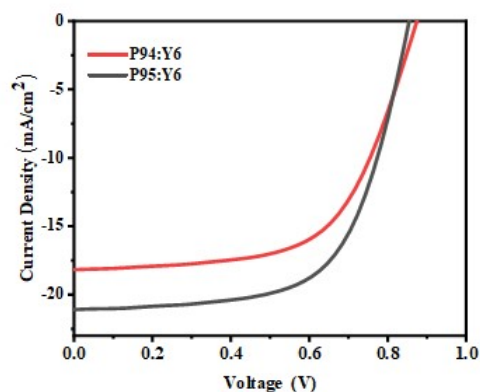

**Figure S3.** Photovoltaic performance of the OSCs based on P94:Y6 and P95:Y6 with optimized device conditions.

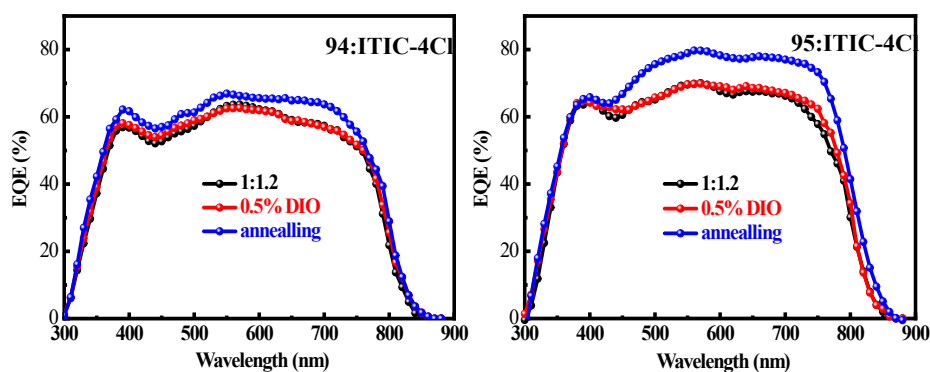

**Figure S4.** The external quantum efficiency (EQE) spectra of the devices based on (a) P94:ITIC-4Cl and (b) P95:ITIC-4Cl under various conditions.

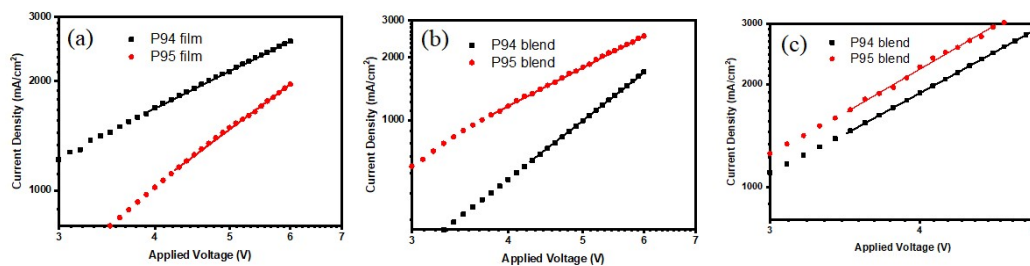

**Figure S5.**  $J$ - $V$  characteristics of a) hole-only devices based on P94 and P95 neat films, b) hole-only devices based on the P94:ITIC-4Cl and P95:ITIC-4Cl blend films,

c) electron-only devices based on the P94:ITIC-4Cl and P95:ITIC-4Cl blend films.

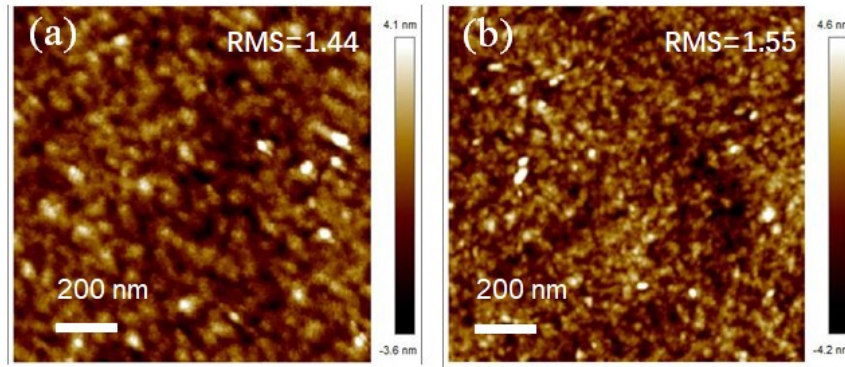

**Figure S6.** AFM height images of a) P94, b) P95 neat films.

**Table S1** Photovoltaic performance of the devices based on 94: ITIC-4Cl with different weight ratios under the illumination of AM1.5G, 100 mW/cm<sup>2</sup>.

| 94: ITIC-4Cl | $V_{oc}$ (V) | $J_{sc}$ (mA/cm <sup>2</sup> ) | FF (%) | PCE (%)     |
|--------------|--------------|--------------------------------|--------|-------------|
| 1:1          | 0.93         | 13.63                          | 56.9   | 7.22 (7.04) |
| 1:1.2        | 0.91         | 15.60                          | 58.1   | 8.27 (8.09) |
| 1:1.5        | 0.91         | 15.32                          | 56.0   | 7.82 (7.80) |

**Table S2** Photovoltaic performance of the devices based on 94: ITIC-4Cl with different DIO under the illumination of AM1.5G, 100 mW/cm<sup>2</sup>.

| DIO (%) | $V_{oc}$ (V) | $J_{sc}$ (mA/cm <sup>2</sup> ) | FF (%) | PCE (%)     |
|---------|--------------|--------------------------------|--------|-------------|
| 0%      | 0.91         | 15.60                          | 58.1   | 8.27 (8.09) |
| 0.5%    | 0.91         | 15.32                          | 56.0   | 7.82 (7.74) |
| 1%      | 0.90         | 15.68                          | 54.2   | 7.65 (7.54) |

**Table S3** Photovoltaic performance of the devices based on 94: ITIC-4Cl with different temperature of thermal annealing under the illumination of AM1.5G, 100 mW/cm<sup>2</sup>.

| Temperature (°C) | $V_{oc}$ (V) | $J_{sc}$ (mA/cm <sup>2</sup> ) | FF (%) | PCE (%)       |
|------------------|--------------|--------------------------------|--------|---------------|
| 25               | 0.91         | 15.60                          | 58.1   | 8.25 (8.09)   |
| 100              | 0.90         | 16.88                          | 71.4   | 10.82 (10.75) |
| 120              | 0.90         | 15.31                          | 72.6   | 9.97 (9.94)   |

**Table S4** Photovoltaic performance of the devices based on 95: ITIC-4Cl with different

weight ratios under the illumination of AM1.5G, 100 mW/cm<sup>2</sup>.

| <b>95: ITIC-4Cl</b> | $V_{oc}$ (V) | $J_{sc}$ (mA/cm <sup>2</sup> ) | FF (%) | PCE (%)       |
|---------------------|--------------|--------------------------------|--------|---------------|
| 1:1                 | 0.88         | 15.54                          | 69.2   | 9.46 (9.30)   |
| 1:1.2               | 0.87         | 17.80                          | 70.6   | 10.94 (10.75) |
| 1:1.5               | 0.87         | 15.46                          | 68.9   | 9.26 (9.11)   |

**Table S5** Photovoltaic performance of the devices based on 95: ITIC-4Cl with different DIO under the illumination of AM1.5G, 100 mW/cm<sup>2</sup>.

| DIO (%) | $V_{oc}$ (V) | $J_{sc}$ (mA/cm <sup>2</sup> ) | FF (%) | PCE (%)       |
|---------|--------------|--------------------------------|--------|---------------|
| 0%      | 0.87         | 17.80                          | 70.6   | 10.94 (10.75) |
| 0.5%    | 0.86         | 17.92                          | 69.3   | 10.68 (10.44) |
| 1%      | 0.85         | 16.21                          | 63.3   | 8.72 (8.65)   |

**Table S6** Photovoltaic performance of the devices based on 95: ITIC-4Cl with different temperature of thermal annealing under the illumination of AM1.5G, 100 mW/cm<sup>2</sup>.

| Temperature (°C) | $V_{oc}$ (V) | $J_{sc}$ (mA/cm <sup>2</sup> ) | FF (%) | PCE (%)       |
|------------------|--------------|--------------------------------|--------|---------------|
| 0%               | 0.87         | 17.80                          | 70.6   | 10.94 (10.75) |
| 100              | 0.86         | 20.87                          | 75.3   | 13.51 (13.37) |
| 150              | 0.86         | 20.18                          | 74.5   | 12.93 (12.55) |

**Table S7.** PCE values based on reported A<sub>1</sub>-A<sub>2</sub> typed binary OSCs since 2013 year and the photovoltaic performance for P94 and P95 based devices.<sup>[1-18]</sup>

| NO.              | Donor:acceptor                | $V_{oc}$ (V) | $J_{sc}$ (mA/cm <sup>2</sup> ) | FF (%)      | PCE (%)      | Referenc<br>e |
|------------------|-------------------------------|--------------|--------------------------------|-------------|--------------|---------------|
| <b>This work</b> | <b>P95:ITIC-4Cl</b>           | <b>0.86</b>  | <b>20.87</b>                   | <b>75.3</b> | <b>13.51</b> | -----         |
|                  | <b>P94:ITIC-4Cl</b>           | <b>0.90</b>  | <b>16.88</b>                   | <b>71.4</b> | <b>10.82</b> | -----         |
| 1                | PffBT-DPP:[70]PCBM            | 0.74         | 12.5                           | 74          | 6.8          | 1             |
| 2                | PffBT-DPP:MeIC                | 0.78         | 4.5                            | 58          | 2            | 1             |
| 3                | TBT-DPP:PC <sub>71</sub> BM   | 0.31         | -3.82                          | 32.1        | 0.39         | 2             |
| 4                | FTBT-DPP:PC <sub>71</sub> BM  | 0.63         | -3.31                          | 54.9        | 1.15         | 2             |
| 5                | HFTBT-DPP:PC <sub>71</sub> BM | 0            | 0                              | 0           | 0            | 2             |
| 6                | PBTZ-TTz:IT-4F                | 0.86         | 11.8                           | 57.9        | 5.9          | 3             |
| 7                | PV2TC-BDD:IT-4F               | 0.87         | 18.83                          | 69.97       | 11.50        | 4             |
| 8                | PV2TC-FTAZ:IT-4F              | 0.71         | 20.49                          | 58.57       | 8.56         | 4             |
| 9                | PBDB-TAZ20:ITIC               | 0.87         | 19.03                          | 73.5        | 12.34        | 5             |
| 10               | PBDB-TAZ40:ITIC               | 0.84         | 18.46                          | 71.5        | 11.27        | 5             |
| 11               | PBTZ-4TC:ITIC-Th1             | 0.88         | 15.72                          | 62.62       | 8.72         | 6             |



| NO. | Donor:acceptor                   | $V_{oc}$ (V) | $J_{sc}$<br>(mA/cm <sup>2</sup> ) | FF (%) | PCE (%) | Referenc<br>e |
|-----|----------------------------------|--------------|-----------------------------------|--------|---------|---------------|
| 12  | PBTZ-C4T:ITIC-Th1                | 0.84         | 16.59                             | 66.65  | 9.34    | 6             |
| 13  | PhI-ffBT:IT-4F                   | 0.91         | 19.41                             | 76     | 13.31   | 7             |
| 14  | ffPhI-ffBT:IT-4F                 | 0.94         | 19.01                             | 71     | 12.74   | 7             |
| 15  | PBDD-BTZ-1:ITIC-Th               | 0.83         | 10.0                              | 54.7   | 4.6     | 8             |
| 16  | PBDD-BTZ-2:ITIC-Th               | 0.94         | 13.2                              | 67.9   | 8.4     | 8             |
| 17  | PBDD-BTZ-3:ITIC-Th               | 1.07         | 11.9                              | 56.7   | 7.3     | 8             |
| 18  | P1:PC <sub>71</sub> BM           | 0.61         | 11.32                             | 58     | 4.0     | 9             |
| 19  | P2:PC <sub>71</sub> BM           | 0.68         | 9.25                              | 47     | 3.0     | 9             |
| 20  | P(DTPz-ID):PC <sub>71</sub> BM   | 0.86         | 1.2                               | 30.4   | 0.3     | 10            |
| 21  | P(dDTPz-ID):PC <sub>71</sub> BM  | 0.96         | 1.2                               | 38     | 0.4     | 10            |
| 22  | P(DTPz-DTBT):PC <sub>71</sub> BM | 0.6          | 7.1                               | 43.1   | 1.8     | 10            |
| 23  | P(dDTPzDTBT):PC <sub>71</sub> BM | 1.0          | 11.4                              | 43.2   | 5.0     | 10            |
| 24  | PB24-3TDC:ITIC-Th                | 0.9          | 16.8                              | 68     | 10.3    | 11            |
| 25  | PB68-3TDC:ITIC-Th                | 0.99         | 12.2                              | 65     | 7.8     | 11            |
| 26  | PTB7-Th:PIIG-NDI(OD)             | 0.82         | 5.06                              | 36.3   | 1.70    | 12            |
| 27  | PTB7-Th:PIIG-PDI(EH)             | 0.73         | 5.88                              | 50.2   | 2.21    | 12            |
| 28  | PTB7-Th:PIIG-PDI(OD)             | 0.72         | 8.22                              | 44.2   | 2.68    | 12            |
| 29  | P3HT:P1-C12                      | 0.52         | 0.68                              | 40.9   | 0.14    | 13            |
| 30  | P3HT:P1-C20                      | 0.54         | 0.69                              | 41.5   | 0.15    | 13            |
| 31  | P3HT:P2-C12                      | 0.35         | 0.48                              | 35.2   | 0.06    | 13            |
| 32  | P3HT:P2-C20                      | 0.38         | 0.51                              | 39.1   | 0.07    | 13            |
| 33  | PFDTBT:P1-C12                    | 0.88         | 1.30                              | 25.7   | 0.29    | 13            |
| 34  | PFDTBT:P1-C20                    | 0.88         | 1.36                              | 25.7   | 0.31    | 13            |
| 35  | PFDTBT:P2-C12                    | 0.75         | 0.39                              | 27.0   | 0.08    | 13            |
| 36  | PFDTBT:P2-C20                    | 0.76         | 0.42                              | 27.4   | 0.09    | 13            |
| 37  | P1:L8-BO                         | 0.766        | 18.12                             | 73.72  | 10.37   | 14            |
| 38  | P3:L8-BO                         | 0.742        | 22.80                             | 74.30  | 12.56   | 14            |
| 39  | PBTz-TC:IT-4F                    | 0.86         | 20.56                             | 66.55  | 11.69   | 15            |
| 40  | PBTz-TC/IT-4F                    | 0.86         | 20.54                             | 68.18  | 11.96   | 15            |
| 41  | PBTz-TTC:IT-4F                   | 0.84         | 18.38                             | 60.94  | 9.37    | 15            |
| 42  | PBTz-TTC/IT-4F                   | 0.84         | 18.47                             | 61.40  | 9.52    | 15            |
| 43  | PBTz-TC:IT-4F(TMB)               | 0.84         | 20.61                             | 71.76  | 12.42   | 15            |
| 44  | PBTz-TC/IT-4F(TMB)               | 0.84         | 20.91                             | 72.69  | 12.81   | 15            |
| 45  | PTBTfBTzSi:PC <sub>71</sub> BM   | 0.94         | 14.36                             | 66.0   | 8.91    | 16            |
| 46  | PffBT4T:ITIC-Th                  | 0.858        | 13.47                             | 57.1   | 6.6     | 17            |
| 47  | PffBT4T-B:ITIC-Th                | 0.972        | 15.59                             | 61.8   | 9.4     | 17            |
| 48  | PTT-FBTz:PC <sub>71</sub> BM     | 0.848        | 7.40                              | 41.9   | 2.63    | 18            |
| 49  | PTTz-FBTz:PC <sub>71</sub> BM    | 0.880        | 11.25                             | 69.9   | 7.03    | 18            |

**Table S8** Optimized photovoltaic performance of polymer blends (A<sub>1</sub>-A<sub>2</sub> based

polymer donor and Y acceptor series)

| Polymer donor | Acceptor    | $V_{oc}$<br>(V) | $J_{sc}$<br>( $\text{mA}\cdot\text{cm}^{-2}$ ) | $FF$<br>(%) | PCE<br>(%) | Refs                                              |
|---------------|-------------|-----------------|------------------------------------------------|-------------|------------|---------------------------------------------------|
| PDTz-<br>BDD  | BTP-<br>eC9 | 0.78            | 22.05                                          | 59.97       | 10.36      | Chem. J. Chinese Universities, 2023, 44, 20230157 |
| P1            | L8-BO       | 0.766           | 18.12                                          | 73.72       | 10.37      | Polym. Chem., 2023, 14, 4227–4234                 |
| P3            | L8-BO       | 0.742           | 22.80                                          | 74.30       | 12.56      | Polym. Chem., 2023, 14, 4227–4234                 |
| P94           | Y6          | 0.864           | 18.33                                          | 63.14       | 10.01      | This work                                         |
| P95           | Y6          | 0.851           | 21.08                                          | 65.02       | 11.66      | This work                                         |

**Table S9.** The hole and electron mobility data and the ratio  $\mu_h/\mu_e$  of neat and blend films.

| Polymers:ITIC-4Cl | $\mu_h$ ( $\text{cm}^2 \text{V}^{-1} \text{s}^{-1}$ ) | $\mu_e$ ( $\text{cm}^2 \text{V}^{-1} \text{s}^{-1}$ ) | $\mu_h/\mu_e$ |
|-------------------|-------------------------------------------------------|-------------------------------------------------------|---------------|
| P94 neat film     | $6.25 \times 10^{-4}$                                 |                                                       |               |
| P95 neat film     | $1.06 \times 10^{-3}$                                 |                                                       |               |
| P94 blend film    | $4.88 \times 10^{-4}$                                 | $1.34 \times 10^{-3}$                                 | 0.36          |
| P95 blend film    | $8.03 \times 10^{-4}$                                 | $1.36 \times 10^{-3}$                                 | 0.59          |

## Reference

- [1] Pan L. H., Liu T., Wang J. Y., *et al.* Efficient Organic Ternary Solar Cells Employing Narrow Band Gap Diketopyrrolopyrrole Polymers and Nonfullerene Acceptors[J]. Chemistry of Materials, 2020, 32(17): 7309-7317
- [2] Du J. P., Feng S. S., Qin P. J., *et al.* Bis(thien-2-yl)-2,1,3-benzothiadiazole-diketopyrrolopyrrole- based acceptor - acceptor conjugated polymers: Design, synthesis, and the synergistic effect of the substituent on their solar cell properties[J]. 2020, 137(43): 49342
- [3] Guo H., Huang X. X., Liu Z. J., *et al.* Novel polymer donors based on simple A1- $\pi$ -

- A2 structure for non-halogen solvent-processed organic solar cells[J]. *Dyes and Pigments*, 2021, 196: 109817
- [4] Liu Z. J., Chen X. Y., Huang S. R., *et al.* Novel efficient acceptor(1)-acceptor(2) type copolymer donors: Vinyl induced planar geometry and high performance organic solar cells[J]. *Chemical Engineering Journal*, 2021, 419: 129532
- [5] Zhang Y. D., Shao Y. M., Wei Z. Y., *et al.* "Double-Acceptor-Type" Random Conjugated Terpolymer Donors for Additive-Free Non-Fullerene Organic Solar Cells[J]. *ACS Applied Materials & Interfaces*, 2020, 12(18): 20741-20749
- [6] Guo H., Huang B., Zhang L. F., *et al.* Double Acceptor Block-Containing Copolymers with Deep HOMO Levels for Organic Solar Cells: Adjusting Carboxylate Substituent Position for Planarity[J]. *ACS Applied Materials & Interfaces*, 2019, 11(17): 15853-15860
- [7] Yu J. W., Chen P., Koh C. W., *et al.* Phthalimide-Based High Mobility Polymer Semiconductors for Efficient Nonfullerene Solar Cells with Power Conversion Efficiencies over 13%[J]. *Advanced Science*, 2019, 6(2): 1801743
- [8] Guo H., Chen L., Huang B., *et al.* Double acceptor block-based copolymers forefficient organic solar cells: side-chain and $\pi$ -bridge engineered high open-circuit voltage andsmall driving force[J]. *Polymer Chemistry*, 2019, 10: 6227-6235
- [9] Chang S. W., Muto T., Kondo T., *et al.* Double acceptor donor-acceptor alternating conjugated polymers containing cyclopentadithiophene, benzothiadiazole and thienopyrroledione: toward subtractive color organic photovoltaics[J]. *Polymer Journal*, 2017, 49(1): 113-122
- [10] Jeon S. J., Lee T. H., Han Y. W., *et al.* Design and synthesis of 2D A1- $\pi$ -A2 copolymers impact on fullerene network for efficient polymer solar cells[J]. *Polymer*, 2018, 149: 85-95
- [11] An Y. K., Liao X. F., Chen L., *et al.* A1-A2 Type Wide Bandgap Polymers for High - Performance Polymer Solar Cells: Energy Loss and Morphology[J]. *Solar RRL*, 2019, 3(1): 1800291
- [12] Wang X. F., Lv L., Li L. L., *et al.* High-Performance All-Polymer Photoresponse

- Devices Based on Acceptor-Acceptor Conjugated Polymers[J]. *Advanced Functional Materials*, 2016, 26(34): 6306-6315
- [13] Ge C. W., Mei C. Y., Ling J., *et al.* Acceptor-Acceptor Conjugated Copolymers Based on Perylenediimide and Benzothiadiazole for All-Polymer Solar Cells[J]. *Journal of Polymer Science Part A-Polymer Chemistry*, 2014, 52(8): 1200-1215
- [14] Shen S, Tu Q, Tao H, *et al.* Side-chain engineering of wide-bandgap copolymers based on two different electron-deficient units for high-performance polymer solar cells[J]. *Polymer Chemistry*, 2023, 14(36): 4227-4234
- [15] Deng J, Huang S, Liu J, *et al.* Layer-by-layer and non-halogenated solvent processing of benzodithiophene-free simple polymer donors for organic solar cells[J]. *Chemical Engineering Journal*, 2022, 443: 136515
- [16] Keshtov M L, Kuklin S A, Khokhlov A R, *et al.* Regular conjugated D-A copolymer containing two benzotriazole and benzothiadiazole acceptors and dithienosilole donor units for photovoltaic application[J]. *RSC Adv.*, 2017, 7(78): 49204-49214
- [17] Chen S, Yao H, Li Z, *et al.* Surprising Effects upon Inserting Benzene Units into a Quaterthiophene-Based D-A Polymer-Improving Non-Fullerene Organic Solar Cells via Donor Polymer Design[J]. *Advanced Energy Materials*, 2017, 7(12): 1602304
- [18] Qi F, Song J, Xiong W, *et al.* Two wide-bandgap fluorine-substituted benzotriazole based terpolymers for efficient polymer solar cells[J]. *Dyes and Pigments*, 2018, 155: 126-134
